# Supplementary material
Source: publisher site journal article supplement (https://www.dovepress.com/article/536484)
Supplement: Supplementary file 1 [file 536484%20%252509Supplementary%20materials.docx]

Supplementary materials

Biomimetic aggregation-induced emission luminogens mediated effective phototherapy and immune checkpoint blockade for the synergistic treatment of lung cancer

**Authors:** Langyu Yang 1, 2, *, Minyan Wei 1, 2, *, Xiaohua Deng 1, 2, *, Linlong He 1, 2, Yinshan Lin 1, 2, Xufeng Lin 2, Dazhi Zhou 2, Ming Li 3, Aiping Qin 1, 2, Lingmin Zhang 1, 2, Zizhang Ouyang1

**Affiliations:**

1 The Affiliated Qingyuan Hospital (Qingyuan People's Hospital), Guangzhou Medical University, Qingyuan 511518, Guangdong, China

2 The Affiliated Panyu Central Hospital, The Fifth Affiliated Hospital, Guangzhou Municipal and Guangdong Provincial Key Laboratory of Molecular Target & Clinical Pharmacology, the NMPA and State Key Laboratory of Respiratory Disease, AIE Pharmaceutical Biology Innovation Research Center, School of Pharmaceutical Sciences, Guangzhou Medical University, Guangzhou 511436, China

3 Medical Research Center, The Affiliated Guangdong Second Provincial General Hospital of Jinan University, Jinan University, Guangzhou, Guangdong, 510317,

China

* The authors contributed to the work equally.

E-mail: [zhanglm@gzhmu.edu.cn](mailto:zhanglm@gzhmu.edu.cn) (Lingmin Zhang); 2019695272@gzhmu.edu.cn (Zizhang Ouyang)


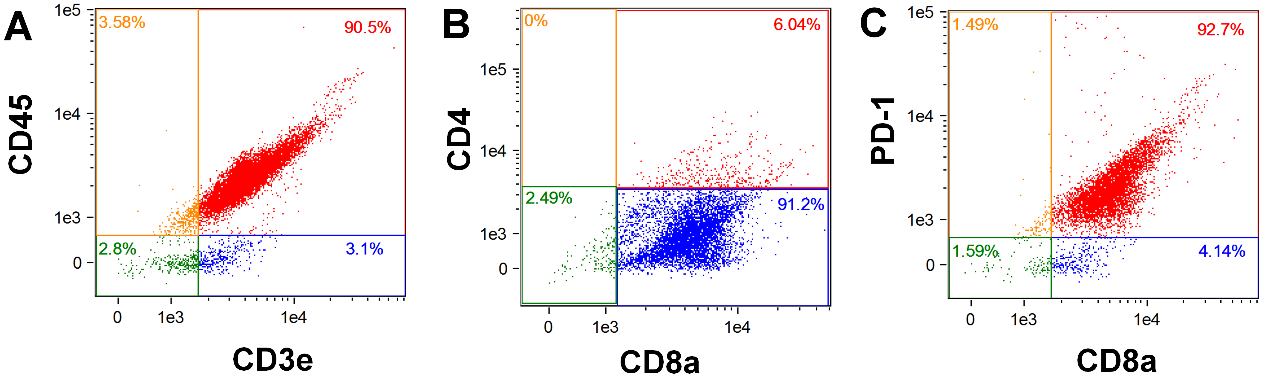


**Figure S1** FACS analysis of the markers in different cells. (A) T cells. (B) CD8+ T cells. (C) CD8+ T cells overexpressed with PD-1. Flow cytometric plots to show the expression of CD4, CD8, PD-1, CD45, and CD3 on T cells harvested from mice.


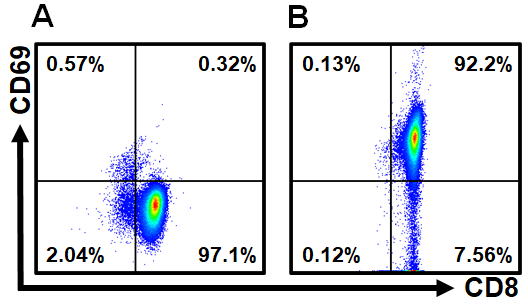


**Figure S2** FACS analysis of the markers in CD8+ T cells. A) Wild type CD8+ T cells. B) PD-1 activated cells.


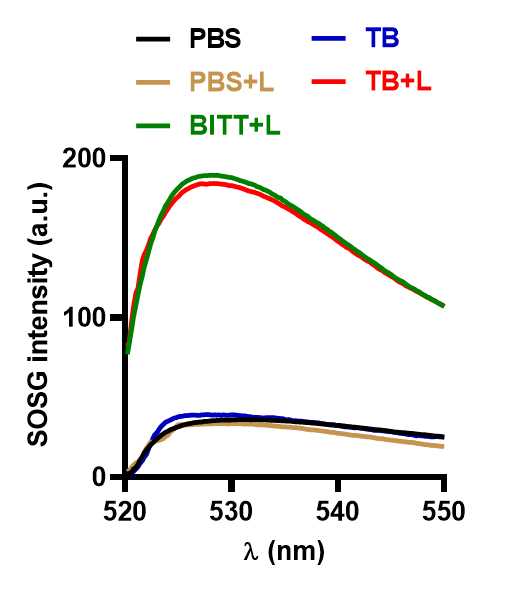


**Figure S3** Photodynamic properties of different TB nanoparticles in solution detected by single-linear oxygen SOSG probe.


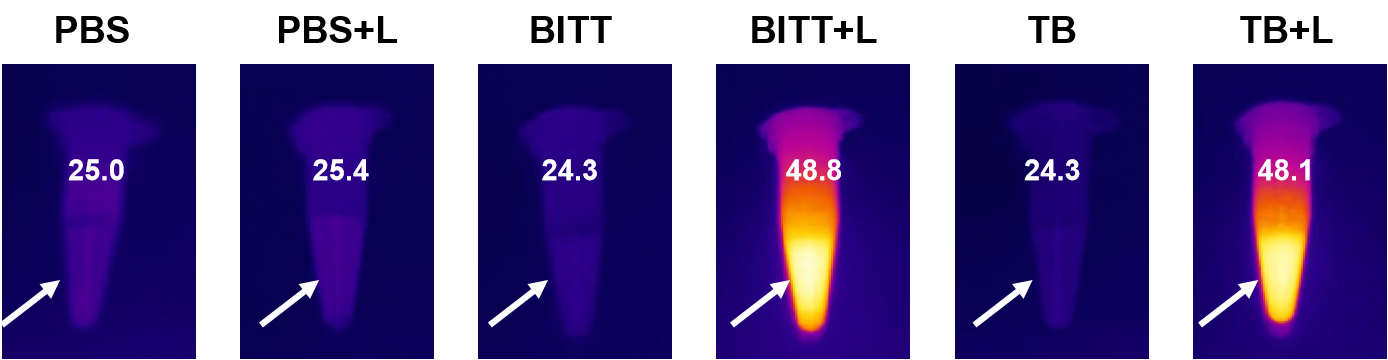


**Figure S4** The infrared thermal imager observed the temperature changes of different components of BITT in the solution. The white arrow represents the location of the sample.


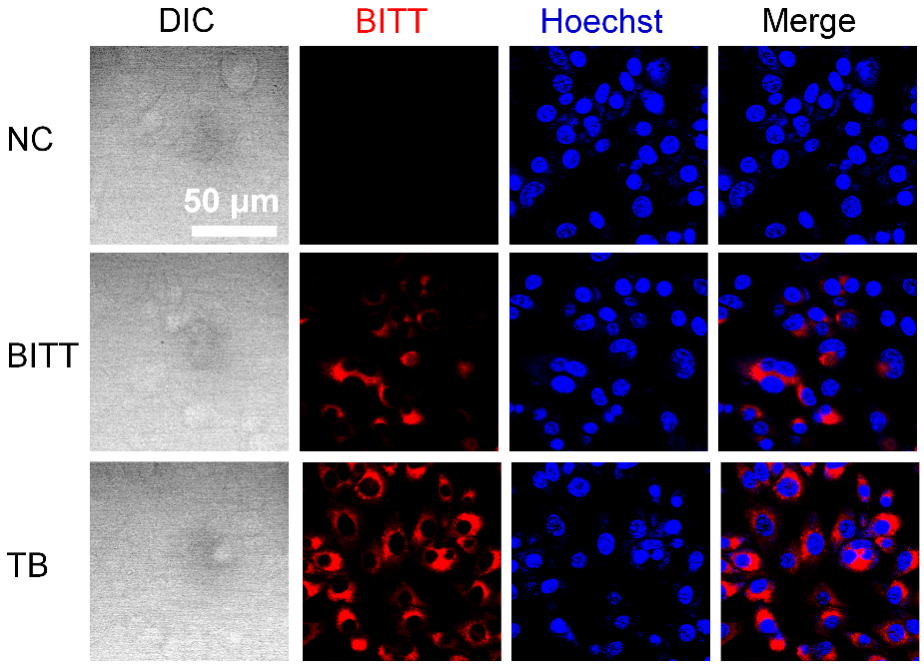


**Figure S5** CLSM analysis of LLC cells treated with BITT-based nanoparticles for 9 h. Cell nuclei were stained with Hoechst (blue).


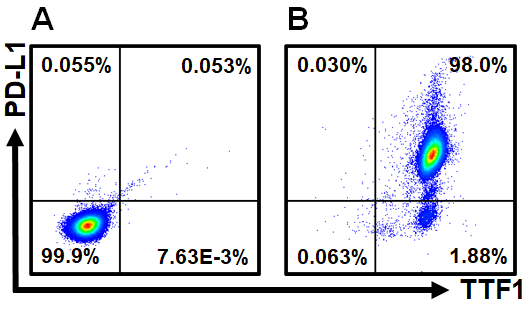


**Figure S6** FACS analysis of the markers in LLC cells. (A) LLC cells without staining. (B) LLC cells labeled with PD-L1 and TTF1.


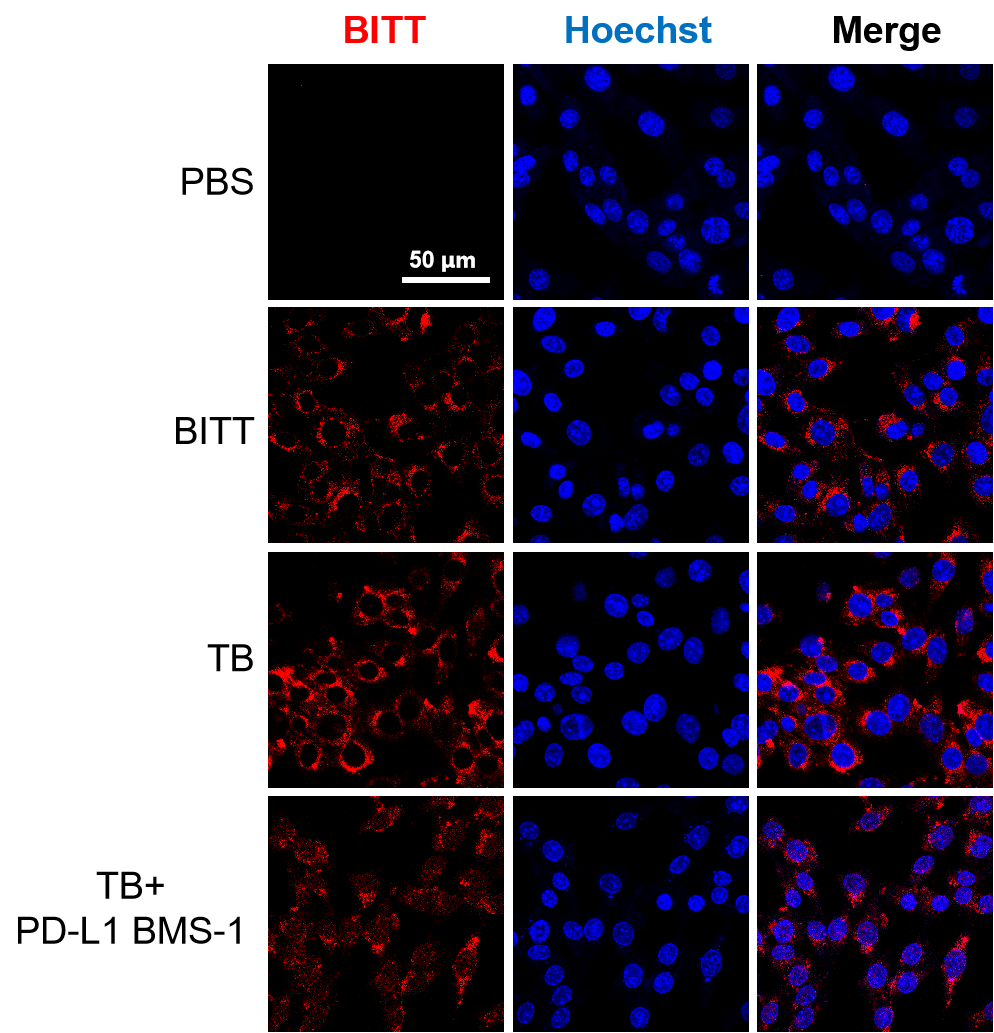


**Figure S7** CLSM observed the effect of BMS-1 on the uptake of different BITT components by LLC cells.


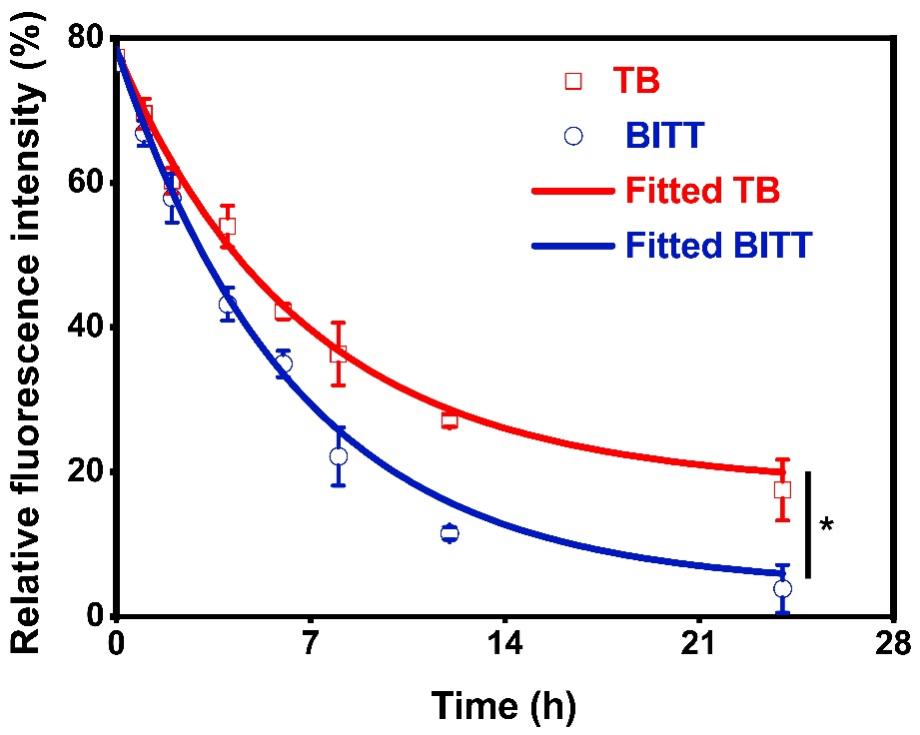


**Figure S8** Pharmacokinetics of TB and BITT (BITT: 1 mg/kg) on LLC tumor-bearing mice after intravenous injection. * *P*<0.05.


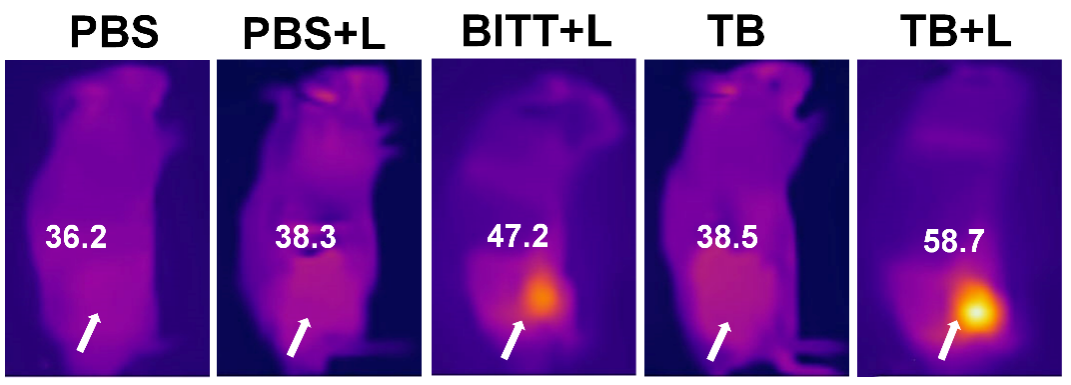


**Figure S9** Thermal imaging on the tumor-bearing mice. The tumor-bearing mice were administrated with PBS, BITT, and TB (1 mg/kg BITT) via the intravenous injections, respectively. At 12 h after administration, the tumor sites were exposed to a laser irradiation (658 nm, 2 W∙cm-2) for 10 min. The white arrow represented the tumor site.
